# Supplementary material for: Heterogeneity of Human Breast Stem and Progenitor Cells as Revealed by Transcriptional Profiling
Source: PubMed Central journal article supplement (PMC5995162; doi:10.1016/j.stemcr.2018.03.001), 2018-03-29

**Stem Cell Reports, Volume 10**

**Supplemental Information**

**Heterogeneity of Human Breast Stem and Progenitor Cells as Revealed  
by Transcriptional Profiling**

**Justin A. Colacino, Ebrahim Azizi, Michael D. Brooks, Ramdane Harouaka, Shamileh Fouladdel, Sean P. McDermott, Michael Lee, David Hill, Julie Madden, Julie Boerner, Michele L. Cote, Maureen A. Sartor, Laura S. Rozek, and Max S. Wicha**

## Supplemental Table Legends

**Supplemental Table 1.** Comparison of expression of all genes between ALDH<sup>+</sup> and ALDH<sup>-</sup>CD44<sup>-</sup>CD24<sup>+</sup> cells.

**Supplemental Table 2.** Most enriched KEGG pathways for genes differentially expressed between ALDH<sup>+</sup> and ALDH<sup>-</sup>CD44<sup>-</sup>CD24<sup>+</sup> cells.

**Supplemental Table 3.** Comparison of expression of all genes between ALDH<sup>+</sup> and ALDH<sup>-</sup>CD44<sup>-</sup>CD24<sup>+</sup> cells.

**Supplemental Table 4.** Comparison of gene expression between samples of bulk RNA, normalized for housekeeping genes, isolated from ALDH<sup>+</sup> cells that expressed CD44<sup>+</sup>/CD24<sup>-</sup> (Dual) and did not express CD44<sup>+</sup>/CD24<sup>-</sup> (ALDH<sup>+</sup>).

**Supplemental Table 5.** Comparison of single cell gene expression levels between the 4 identified expression clusters of ALDH<sup>+</sup> normal mammary cells.

**Supplemental Table 6.** Comparison of single cell gene expression levels between ALDH<sup>+</sup> normal mammary cells expressing detectable levels of *ALDH1A1* (n=9) compared to cells that did not (n=96).







**Supplemental Figure 4.** Distribution of individual cells across the four single cell expression clusters by (A) individual from which the cells were collected or (B) Expression of ALDH<sup>+</sup> Bulk (ALDH<sup>+</sup> cells which do not express CD44<sup>+</sup>CD24<sup>-</sup>) or ALDH<sup>+</sup>CD44<sup>+</sup>CD24<sup>-</sup> quantified by flow cytometry.

A

|           | NM11 | NM15 | NM17 | Total |
|-----------|------|------|------|-------|
| Cluster 1 | 3    | 0    | 3    | 6     |
| Cluster 2 | 3    | 21   | 4    | 28    |
| Cluster 3 | 10   | 0    | 3    | 13    |
| Cluster 4 | 20   | 18   | 20   | 58    |
| Total     | 36   | 39   | 30   | 105   |

Chi-Sq Test Stat = 34.1, p=6.3E-6

B

|           | ALDH Bulk | Dual | Total |
|-----------|-----------|------|-------|
| Cluster 1 | 3         | 3    | 6     |
| Cluster 2 | 17        | 11   | 28    |
| Cluster 3 | 4         | 9    | 13    |
| Cluster 4 | 38        | 20   | 58    |
| Total     | 62        | 43   | 105   |

Chi-Sq Test Stat = 5.5, p=0.13

**Supplemental Figure 5.** Immunofluorescence antibody staining of adjacent normal breast tissue for DAPI, ALDH1A1, ALDH1A3, CK8/18, and Vimentin, and for panel (C), also CD44. (A) Scale bar = 100 $\mu$ m (B) Scale bar = 10 $\mu$ m, arrow identifies an ALDH1A3<sup>+</sup>, Vimentin<sup>+</sup> cell (C) Yellow arrow identifies a CD44<sup>+</sup>, Vimentin<sup>+</sup>, ALDH1A1<sup>+</sup> cell, while white arrow identifies an ALDH1A3<sup>+</sup>, CD44<sup>+</sup>, CK8/18<sup>+</sup> cell.

Arrow identifies cell with co-expression of CK8/18, Vimentin, and ALDH1A3. Scale bar = 10 $\mu$ m.

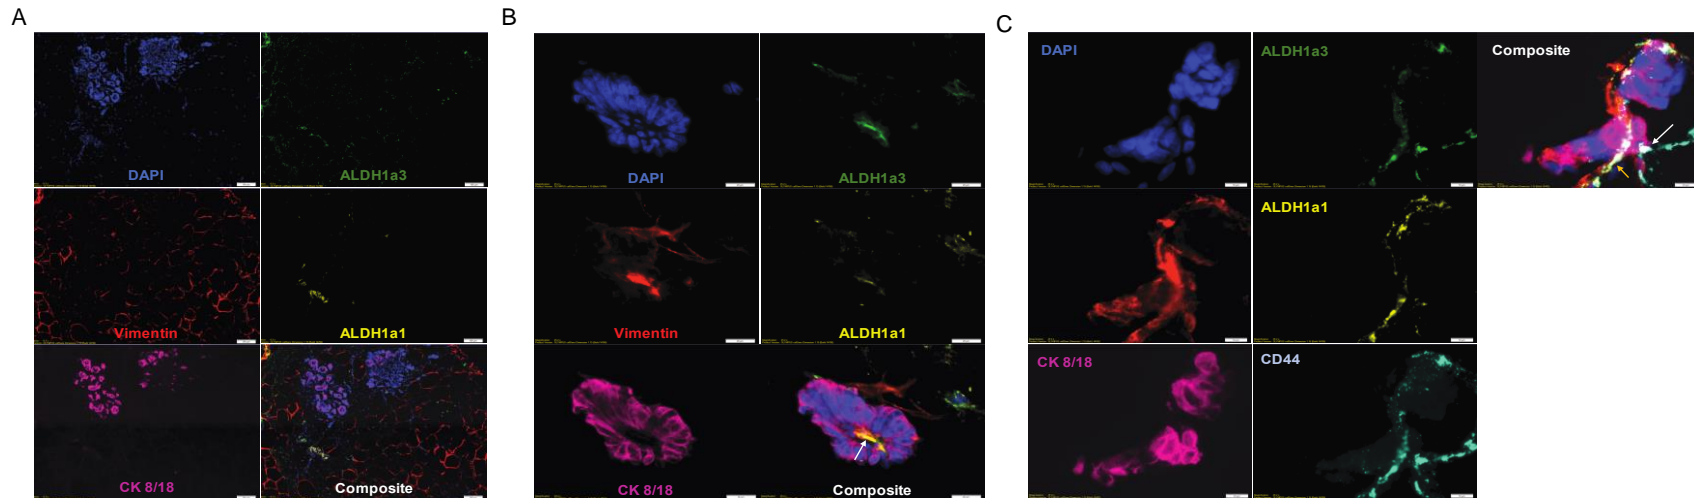

**Supplemental Figure 6.** Violin plot, with genes ordered by statistical significance, comparing gene expression between normal mammary cells expressing detectable levels of *ALDH1A1* (n=9) compared to cells that did not (n=96).

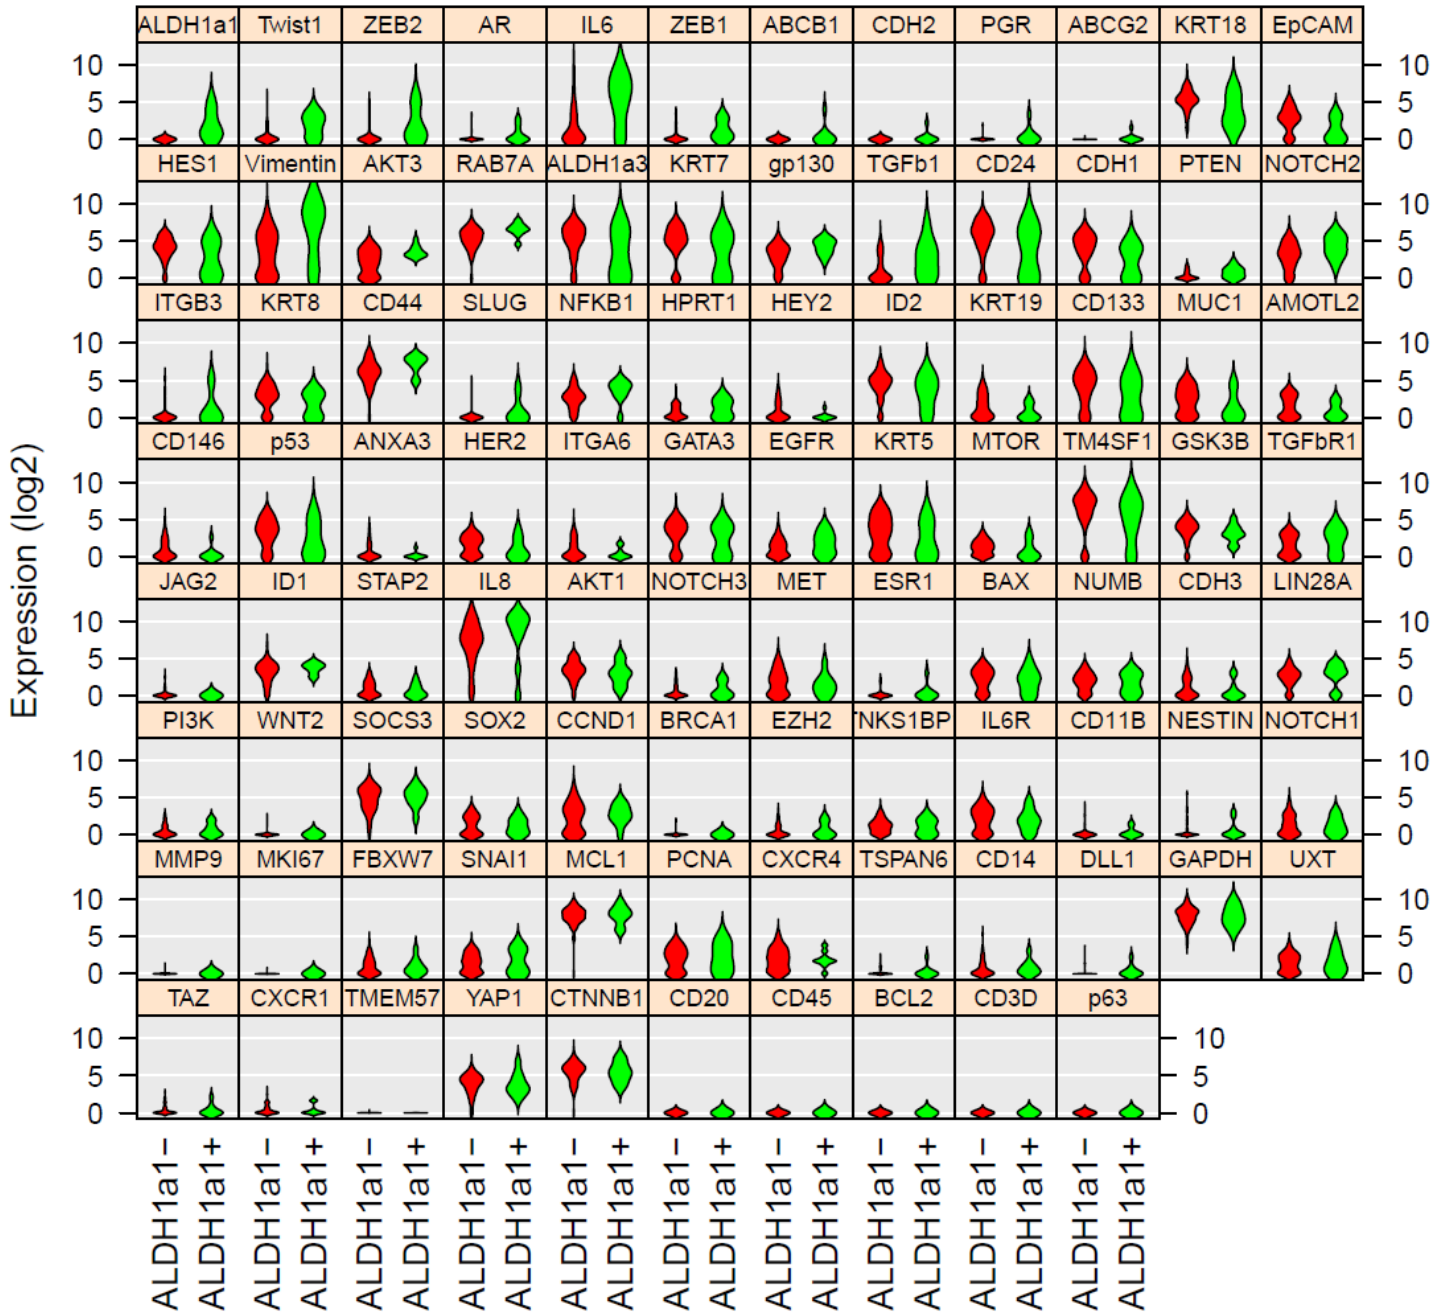

Supplement: mmc1.pdf [file mmc1.pdf]
